# Supplementary material
Source: PubMed Central journal article supplement (PMC8892261)
Supplement: NIHMS1783133-supplement-1.pdf [file NIHMS1783133-supplement-1.pdf]

## Supplemental File 1

### Qualitative Interview Questions

*“Thank you very much for talking with me today. I really appreciate you taking the time to do this. I will be asking you a series of questions about how technology can best be used to enhance your treatment. This information will be very helpful for better understanding ways we can improve our web-based program to be more appealing and engaging for young women in psychiatric treatment programs. We will meet for approximately 45 minutes and our conversation will be audiotaped. Thanks again for your participation.”*

1. How is substance use addressed in your current treatment plan?
2. What is lacking in your current treatment plan regarding substance use and how it affects your mental health recovery?
3. What topics do you think would be particularly important to address regarding substance use?
  - a. Are there certain topics that are important for your particular age group (18-25)?
  - b. What about specific to women?
4. In what ways do you think technology could be used to enhance your treatment here at McLean?
  - a. What types of technology-based programs might be useful while you are receiving treatment?
  - b. What types of technology-based programs might be useful to you when you leave treatment?
5. How could technology help you communicate issues to your treatment providers?
  - a. Would you use a program that gave feedback to your treatment provider on your progress?
  - b. What concerns might you have about confidentiality of the data that is collected?
6. How important would it be to you to have an interactive web-based program?
  - a. In what ways could we make the web-based program more interactive (i.e., videos, questions, etc.)?
7. How important would it be to you to have a visually appealing web-based program?
  - a. What features make a web-based program visually appealing (i.e., pictures, color, etc.)?
